# Supplementary material for: Renin-angiotensin-aldosterone system blockade is associated with higher risk of contrast-induced acute kidney injury in patients with diabetes
Source: publisher site journal article supplement (doi:10.18632/aging.102982), 2020-04-02
Supplement: Supplementary file [file aging-v12i7-102982-supplementary-material-SD1.pdf]

## SUPPLEMENTARY FIGURE

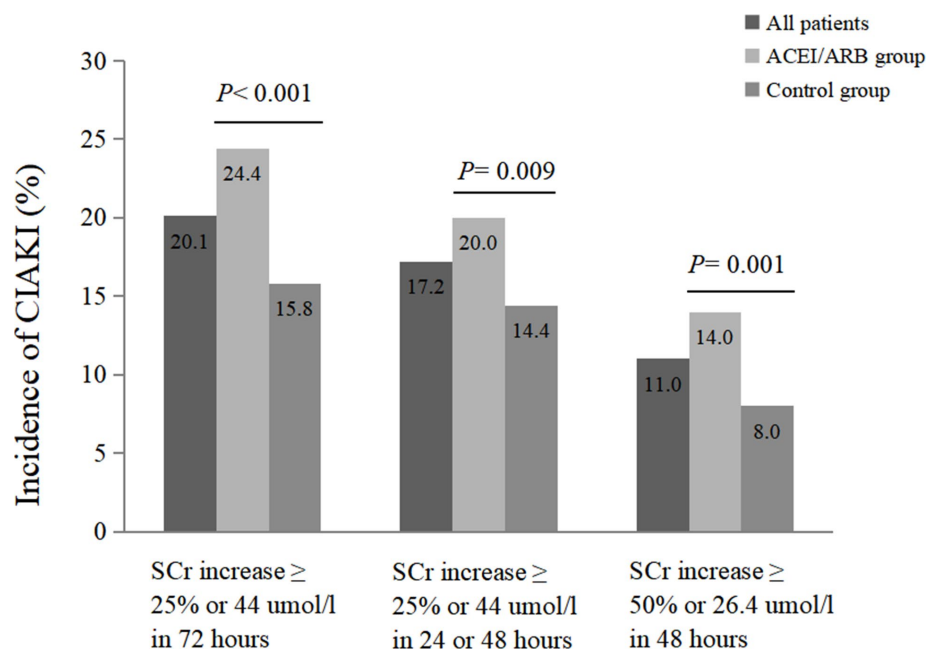

**Supplementary Figure 1. Impact of RAAS inhibition on CIAKI incidence.** Incidence of CIAKI in the PSM-matched cohort under different definitions (after merging matched data from each center, 659 pairs of patients).
